# Supplementary material for: High Prevalence of Leptotrichia amnionii, Atopobium vaginae, Sneathia sanguinegens, and Factor 1 Microbes and Association of Spontaneous Abortion among Korean Women
Source: Hindawi journal article supplement (doi:10.1155/2017/5435089), 2017-01-01
Supplement: f1 [file 5435089.f1.pdf]

**Supplementary table 1: Distribution of the species averaged across the non-abortion, spontaneous abortion and induced abortion groups**

| <b>Bacteria</b>                         | <b>Non abortion (%)</b> | <b>Spontaneous Abortion (%)</b> | <b>Induced abortion (%)</b> |
|-----------------------------------------|-------------------------|---------------------------------|-----------------------------|
| <i>Lactobacillus iners</i>              | 26.210                  | 20.323                          | 28.012                      |
| <i>Lactobacillus crispatus</i>          | 25.291                  | 15.858                          | 20.482                      |
| <i>Pseudomonas trivialis</i>            | 4.303                   | 3.221                           | 3.711                       |
| <i>Atopobium vaginae</i>                | 4.232                   | 23.282*                         | 6.867                       |
| <i>Streptococcus agalactiae</i>         | 4.073                   | 1.873                           | 0.161                       |
| <i>Prevotella bivia</i>                 | 3.372                   | 2.999                           | 4.465                       |
| <i>Microbacterium ginsengisoli</i>      | 2.718                   | 0.003                           | 0.000                       |
| <i>Staphylococcus epidermidis</i>       | 2.544                   | 0.000                           | 0.077                       |
| <i>Aerococcus christensenii</i>         | 2.375                   | 1.759                           | 2.322                       |
| <i>Pseudomonas cedrina</i>              | 2.256                   | 0.025                           | 0.057                       |
| <i>Ureaplasma parvum</i>                | 2.062                   | 0.405                           | 2.193                       |
| <i>Streptococcus pseudopneumoniae</i>   | 1.870                   | 0.000                           | 0.114                       |
| <i>Streptococcus salivarius</i>         | 1.523                   | 0.000                           | 0.098                       |
| <i>Lactobacillus jensenii</i>           | 1.481                   | 0.440                           | 0.502                       |
| <i>Lactobacillus gasseri</i>            | 1.476                   | 0.002                           | 0.821                       |
| <i>Microbacterium hydrocarbonoxydan</i> | 1.194                   | 0.013                           | 0.012                       |
| <i>Lactobacillus fornicalis</i>         | 1.067                   | 0.553                           | 4.251                       |
| <i>Streptococcus anginosus</i>          | 1.044                   | 0.001                           | 0.286                       |
| <i>Megasphaera spp.</i>                 | 1.029                   | 4.608*                          | 1.556                       |
| <i>Mycoplasma hominis</i>               | 0.533                   | 0.617                           | 1.215                       |
| <i>Prevotella timonensis</i>            | 0.352                   | 1.581                           | 0.911                       |
| AY958888                                | 0.278                   | 1.464*                          | 1.103                       |
| <i>Lactobacillus psittaci</i>           | 0.183                   | 0.031                           | 0.188                       |
| <i>Dialister micraerophilus</i>         | 0.181                   | 0.206                           | 0.091                       |
| <i>Gardnerella vaginalis</i>            | 0.130                   | 3.579*                          | 1.811                       |
| AY959109                                | 0.117                   | 0.337*                          | 0.298                       |
| <i>Lactobacillus vaginalis</i>          | 0.094                   | 0.202                           | 0.100                       |
| <i>Ureaplasma urealyticum</i>           | 0.078                   | 0.000*                          | 0.584                       |
| AY959023                                | 0.066                   | 2.102                           | 0.993                       |
| <i>Leptotrichia amnionii</i>            | 0.063                   | 1.928*                          | 1.436*                      |
| <i>Peptoniphilus indolicus</i>          | 0.037                   | 1.350                           | 0.053                       |
| <i>Escherichia coli</i>                 | 0.035                   | 0.003                           | 0.642                       |
| AY958940                                | 0.027                   | 0.120*                          | 0.092                       |
| <i>Prevotella amnii</i>                 | 0.026                   | 1.049                           | 1.729                       |
| DQ666092                                | 0.016                   | 0.472                           | 0.033                       |
| <i>Sneathia sanguinegens</i>            | 0.003                   | 0.549*                          | 1.932                       |
| P003395                                 | 0.002                   | 3.005                           | 0.616                       |
| <i>Escherichia fergusonii</i>           | 0.002                   | 0                               | 0.367                       |

|                                      |       |       |       |
|--------------------------------------|-------|-------|-------|
| <i>AY959069</i>                      | 0.002 | 0.662 | 1.483 |
| <i>AY995258</i>                      | 0.001 | 1.187 | 0.023 |
| <i>Enterococcus faecalis</i>         | 0.001 | 0.001 | 1.155 |
| <i>Peptostreptococcus anaerobius</i> | 0.000 | 1.979 | 0.040 |
| <i>Lactobacillus acidophilus</i>     | 0.000 | 0.000 | 0.251 |
| <i>Lactobacillus johnsonii</i>       | 0.000 | 0     | 1.926 |
| <i>Prevotella denticola</i>          | 0.000 | 0     | 0.463 |

---

Only >0.1% of the major species among the study subjects are presented.

\* **P < 0.05** Wilcoxon rank sum test compared with women with non-abortion

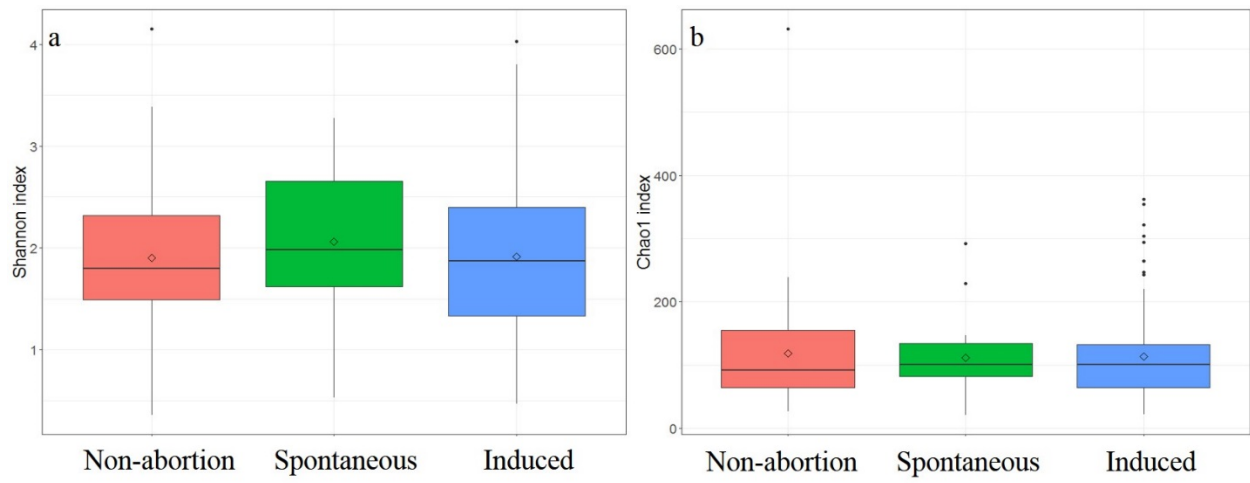

Supplementary figure 1. Shannon index (a) and Chao 1 (b) index were used to measure alpha diversity.
